# Supplementary material
Source: MDPI journal article supplement (doi:10.3390/ceramics9060062)
Supplement: s1 [file ceramics-4329092-supplementary.pdf › ceramics-4329092-supplementary.pdf]

# **Optimizing piezoelectric and ferroelectric properties in BCZT ceramics via Nd/Mn co-doping and sintering engineering**

Wenhao He<sup>1</sup>, Shaohua Su<sup>2,3</sup>, Bijun Fang<sup>1,\*</sup>, Shuai Zhang<sup>1</sup>, Xiaolong Lu<sup>1</sup>, Jianning Ding<sup>1,4,\*</sup>

<sup>1</sup> School of Materials Science and Engineering, State Key Laboratory of Photovoltaic Science and Technology, National Experimental Demonstration Center for Materials Science and Engineering, Changzhou University, Changzhou 213164, China

<sup>2</sup> Longcheng Laboratory of Intelligent Manufacturing, Changzhou, Jiangsu, 213164, China

<sup>3</sup> Mitai Technology (Changzhou) Co., Ltd., Changzhou, Jiangsu, 213164, China

<sup>4</sup> School of Mechanical Engineering, Yangzhou University, Yangzhou 225127, China

\*Corresponding authors.

E-mail addresses: fangbj@cczu.edu.cn (B. Fang), dingjn@cczu.edu.cn (J. Ding)

Tel.: +86 519 86330095; Fax: +86 519 86330095

**Table S1. Cell volume and density of x mol% Nd/Mn BCZT ceramics sintered at different temperatures.**

| Composition<br>(mol%) | Sintering<br>temperature (°C) | Theoretical<br>volume (Å <sup>3</sup> ) | Bulk density<br>(g/cm <sup>3</sup> ) | Theoretical<br>density (g/cm <sup>3</sup> ) | Relative<br>density (%) |
|-----------------------|-------------------------------|-----------------------------------------|--------------------------------------|---------------------------------------------|-------------------------|
| x = 0.05              | 1490                          | 64.60                                   | 5.10                                 | 5.73                                        | 89.1                    |
|                       | 1505                          | 64.60                                   | 5.16                                 | 5.73                                        | 90.1                    |
|                       | 1520                          | 64.47                                   | 5.19                                 | 5.74                                        | 90.4                    |
| x = 0.1               | 1490                          | 64.40                                   | 5.11                                 | 5.75                                        | 88.9                    |
|                       | 1505                          | 64.40                                   | 5.25                                 | 5.75                                        | 91.3                    |
|                       | 1520                          | 64.40                                   | 5.27                                 | 5.75                                        | 91.7                    |
| x = 0.5               | 1490                          | 64.37                                   | 5.08                                 | 5.74                                        | 88.5                    |
|                       | 1505                          | 64.37                                   | 5.27                                 | 5.74                                        | 91.7                    |
|                       | 1520                          | 64.37                                   | 5.20                                 | 5.74                                        | 90.6                    |
| x = 1                 | 1475                          | 64.42                                   | 5.01                                 | 5.73                                        | 87.4                    |
|                       | 1490                          | 64.42                                   | 5.09                                 | 5.73                                        | 88.8                    |
|                       | 1505                          | 64.41                                   | 4.99                                 | 5.73                                        | 87.1                    |

**Table S2.  $P_r$ ,  $E_c$ ,  $d_{33}^*$ ,  $K_p$ ,  $Q_m$  and  $d_{33}$  of x mol% Nd/Mn BCZT ceramics prepared at different sintering temperatures.**

| Composition (mol%) | Sintering temperature (°C) | $P_r$ ( $\mu\text{C}/\text{cm}^2$ ) | $E_c$ (kV/cm) | $d_{33}^*$ (pm/V) | $K_p$       | $Q_m$     | $d_{33}$ (pC/N) |
|--------------------|----------------------------|-------------------------------------|---------------|-------------------|-------------|-----------|-----------------|
| x = 0.05           | 1490                       | 8.81                                | 3.10          | 647.2             | 0.365±0.022 | 130.3±7.4 | 175.8±13.1      |
|                    | 1505                       | 9.39                                | 3.83          | 657.1             | 0.322±0.025 | 97.8±2.7  | 276.0±6.7       |
|                    | 1520                       | 9.42                                | 3.82          | 683.0             | 0.357±0.022 | 131.4±6.4 | 232.3±8.1       |
| x = 0.1            | 1490                       | 8.31                                | 3.07          | 598.4             | 0.335±0.026 | 132.6±2.0 | 217.0±18.2      |
|                    | 1505                       | 8.26                                | 3.02          | 630.1             | 0.327±0.028 | 131.2±4.0 | 240.0±13.1      |
|                    | 1520                       | 8.91                                | 3.44          | 128.8             | 0.343±0.026 | 165.3±7.8 | 222.3±7.4       |
| x = 0.5            | 1490                       | 7.86                                | 3.08          | 668.7             | 0.338±0.025 | 424.5±6.0 | 278.0±7.3       |
|                    | 1505                       | 8.13                                | 3.28          | 670.4             | 0.329±0.026 | 392.8±6.0 | 284.2±4.5       |
|                    | 1520                       | 8.19                                | 3.41          | 685.1             | 0.310±0.024 | 259.9±3.9 | 257.6±6.4       |
| x = 1              | 1475                       | 7.37                                | 2.84          | 584.1             | 0.242±0.022 | 100.6±4.9 | 212.2±12.4      |
|                    | 1490                       | 7.54                                | 2.89          | 627.5             | 0.291±0.022 | 203.7±9.5 | 209.7±8.7       |
|                    | 1505                       | 7.42                                | 2.85          | 595.2             | 0.278±0.028 | 215.6±4.5 | 197.7±9.7       |

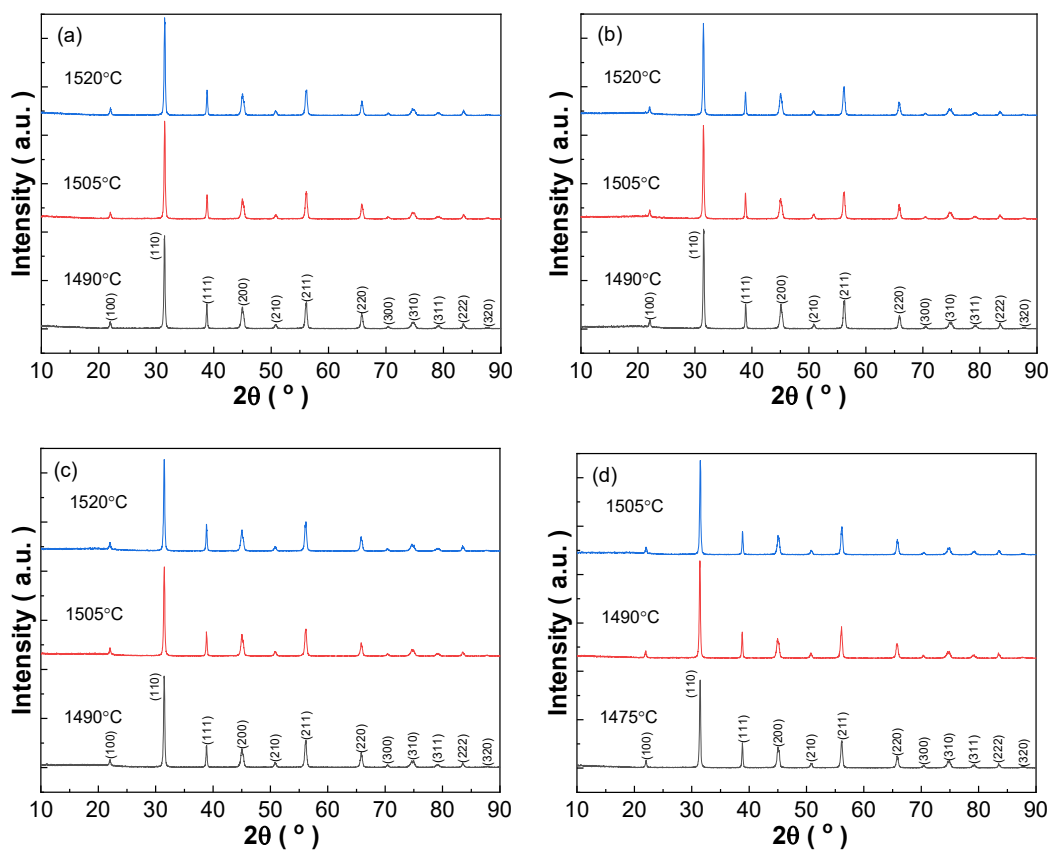

**Figure S1. XRD patterns of  $x$  mol% Nd/Mn BCZT ceramics prepared at different sintering temperatures.**

**(a)  $x=0.05$ ; (b)  $x=0.1$ ; (c)  $x=0.5$ ; (d)  $x=1$ .**

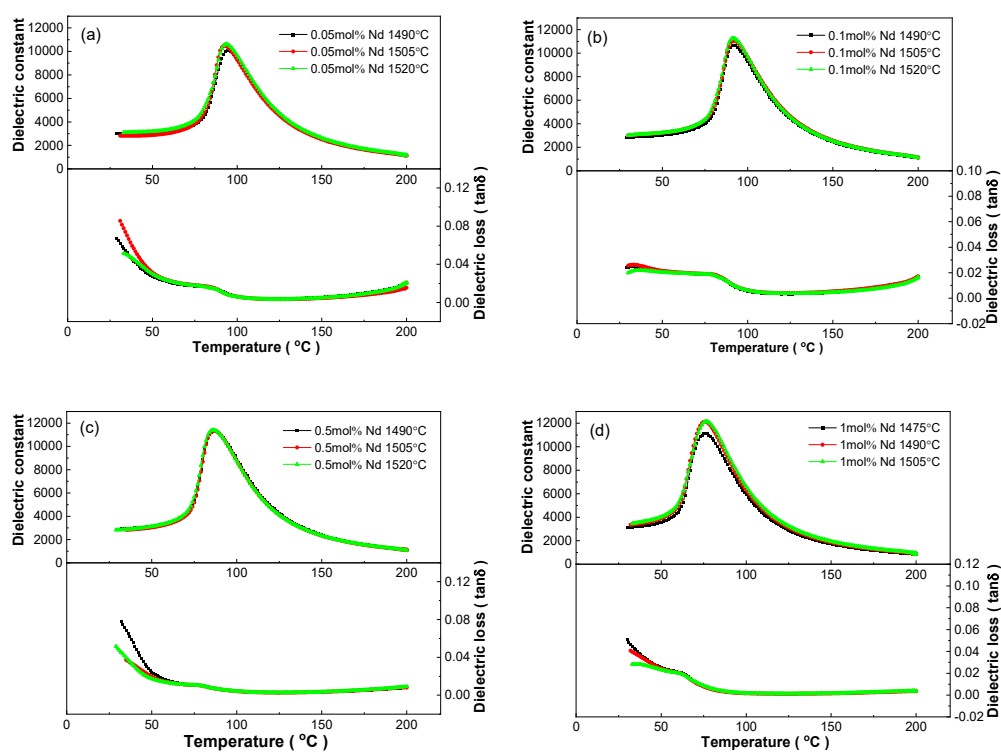

**Figure S2. Dielectric performance-temperature relationship of x mol% Nd/Mn BCZT**

**ceramics prepared at different sintering temperatures at 1 kHz.**

**(a)  $x=0.05$ ; (b)  $x=0.1$ ; (c)  $x=0.5$ ; (d)  $x=1$ .**

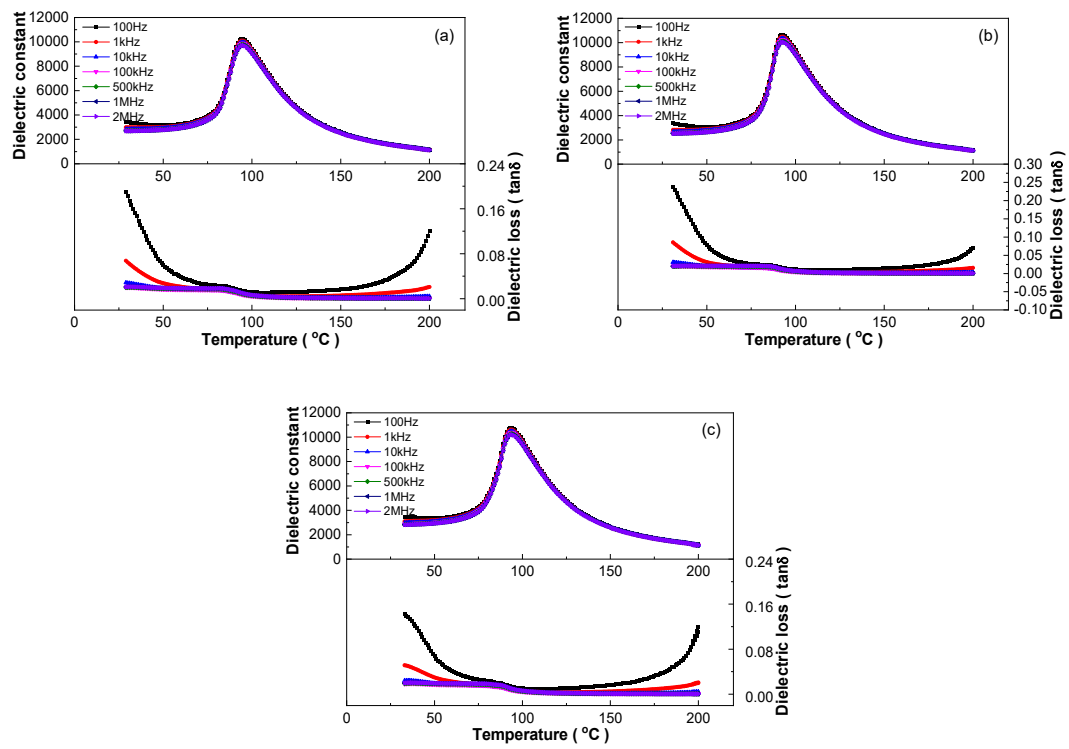

**Figure S3. Effects of frequency on dielectric properties of 0.05 mol% Nd/Mn BCZT ceramics prepared at different sintering temperatures.**

**(a) 1490 °C; (b) 1505 °C; (c) 1520 °C.**

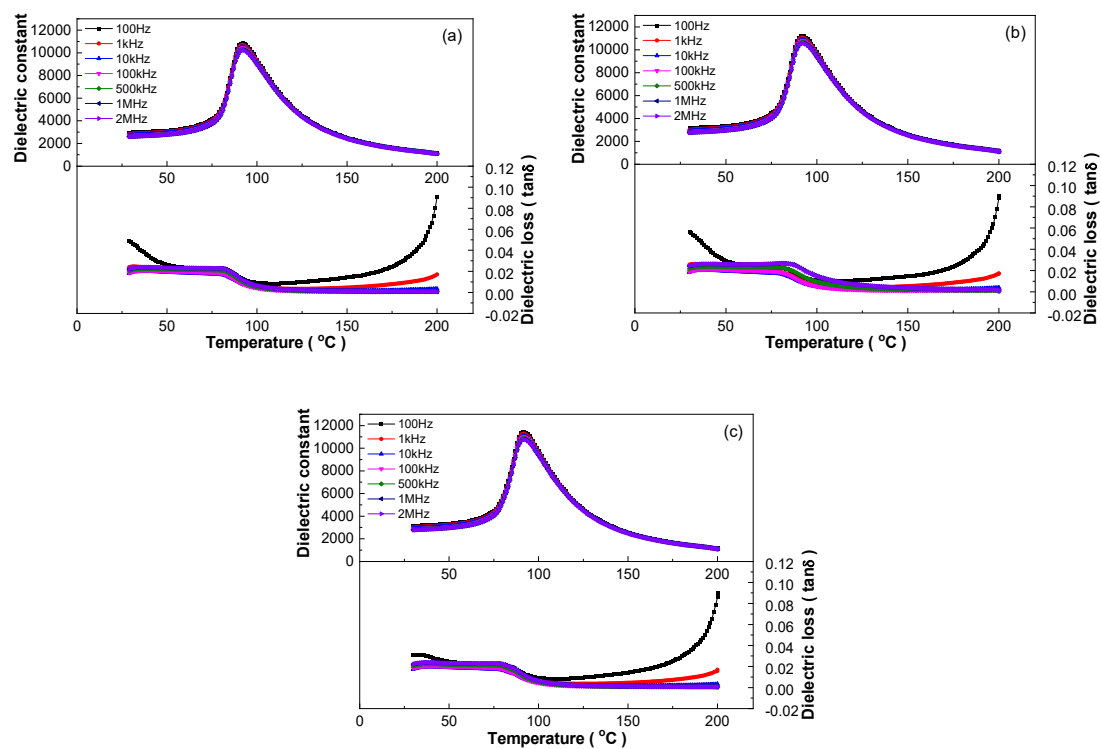

**Figure S4. Effects of frequency on dielectric properties of 0.1 mol% Nd/Mn BCZT**

**ceramics prepared at different sintering temperatures.**

**(a) 1490 °C; (b) 1505 °C; (c) 1520 °C.**

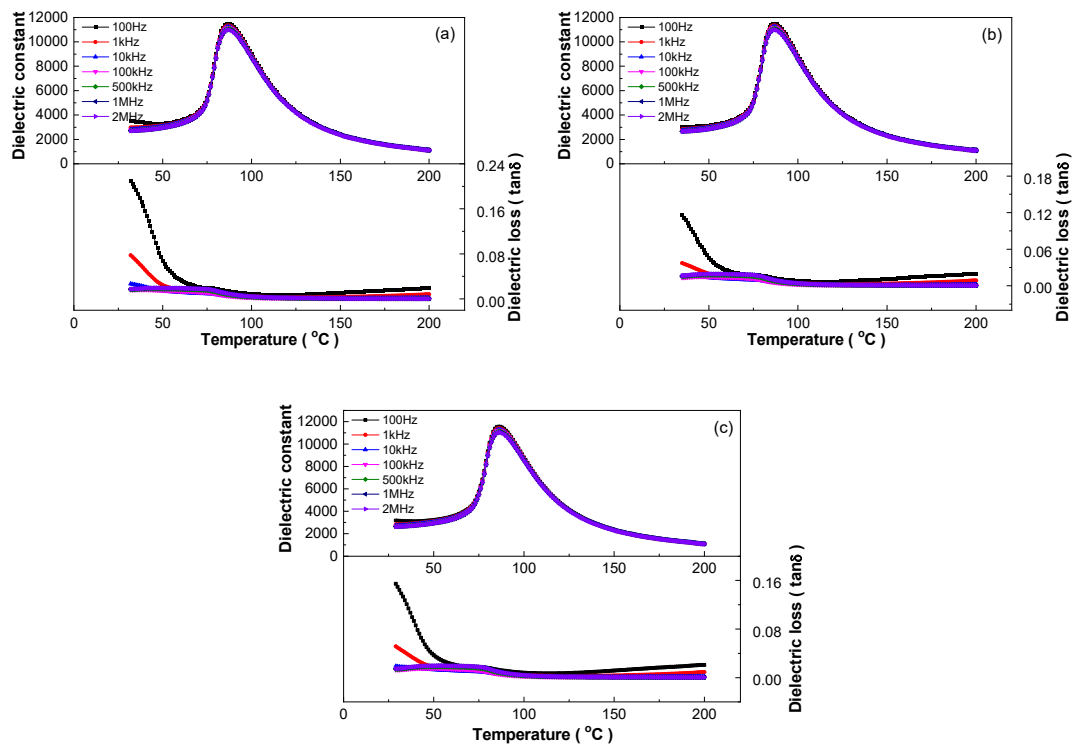

**Figure S5. Effects of frequency on dielectric properties of 0.5 mol% Nd/Mn BCZT ceramics prepared at different sintering temperatures.**

**(a) 1490 °C; (b) 1505 °C; (c) 1520 °C.**



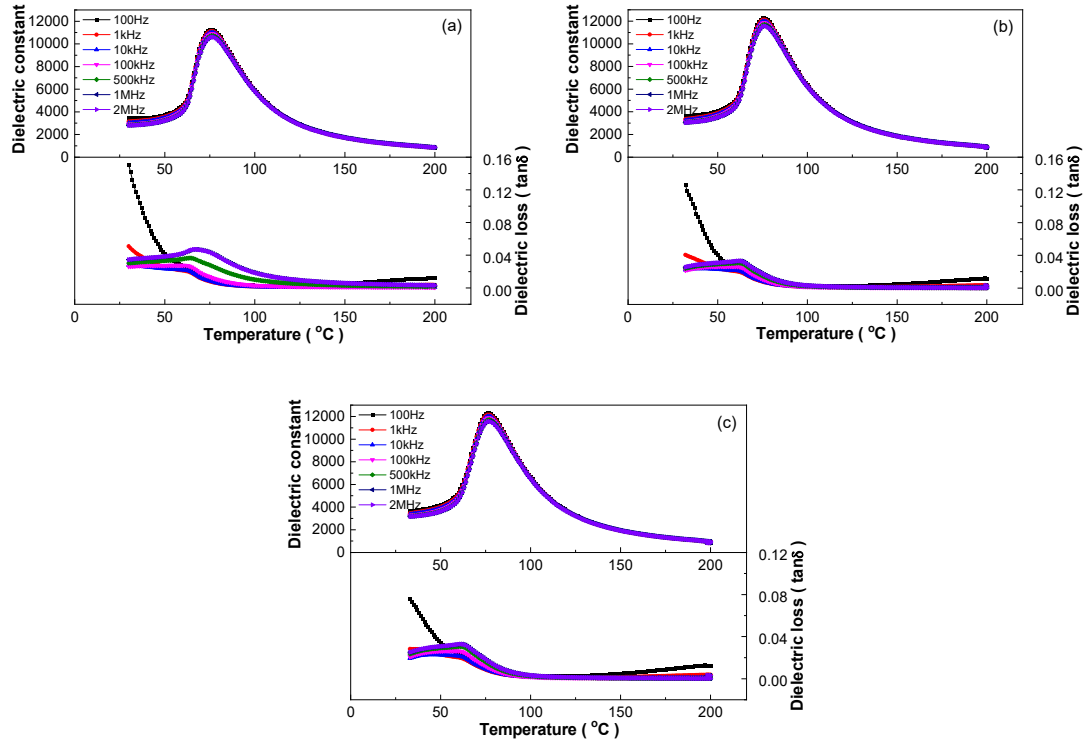

**Figure S6. Effects of frequency on dielectric properties of 1 mol% Nd/Mn BCZT ceramics prepared at different sintering temperatures.**

**(a) 1475 °C; (b) 1490 °C; (c) 1505 °C.**

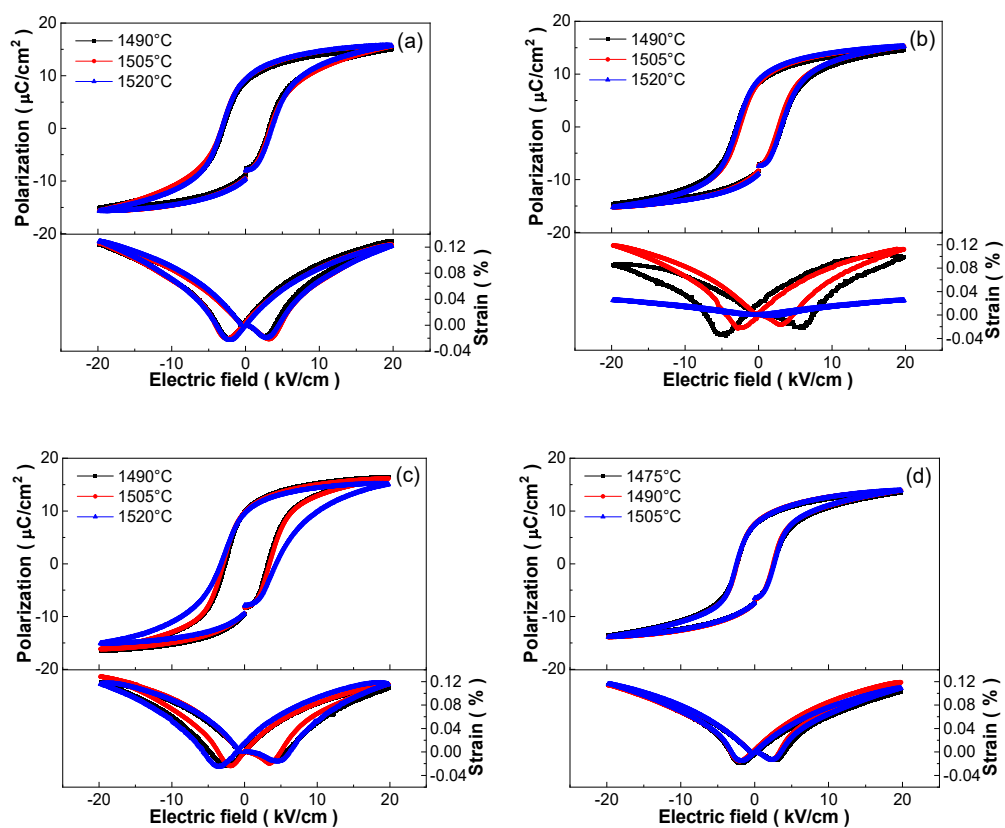

**Figure S7. P-E hysteresis loops and S-E curves of x mol% Nd/Mn BCZT ceramics prepared at different sintering temperatures.**

**(a)  $x=0.05$ ; (b)  $x=0.1$ ; (c)  $x=0.5$ ; (d)  $x=1$ .**

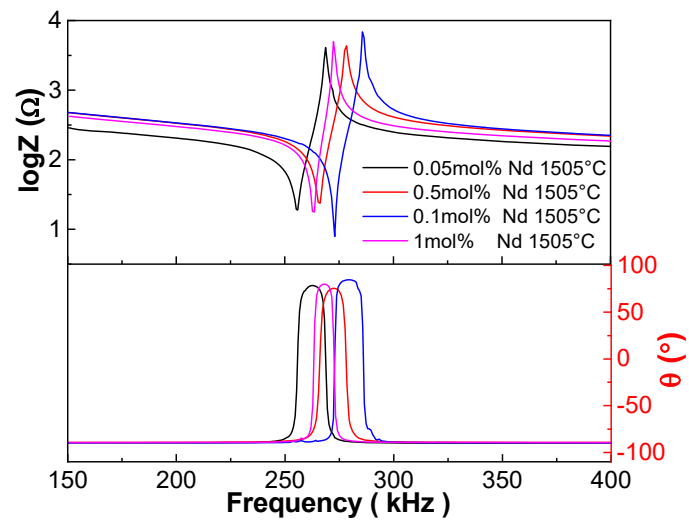

**Figure S8. Impedance and phase angle of x mol% Nd/Mn BCZT ceramics prepared at respective selected sintering temperatures (x = 0.05 mol%, 0.1 mol%, 0.5 mol%, 1 mol%).**

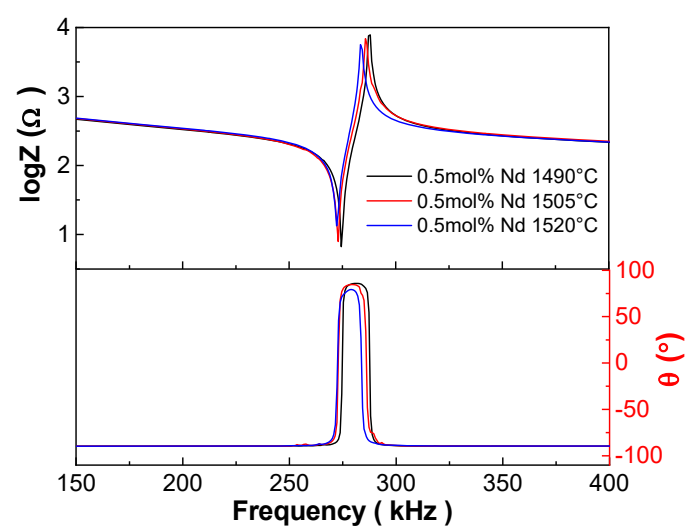

**Figure S9. Impedance and phase angle of the 0.5 mol% Nd/Mn BCZT ceramics sintered at different temperatures.**
